# Supplementary material
Source: ML conference proceedings conference paper supplement (https://openaccess.thecvf.com/content/CVPR2024/html/Xie_SED_A_Simple_CVPR_2024_paper.html)
Supplement: Supplementary file 1 [file Xie_SED_A_Simple_CVPR_2024_supplemental.pdf]

# SED: A Simple Encoder-Decoder for Open-Vocabulary Semantic Segmentation

## Supplementary Material

| Num. | SED (ours) |     |     | CAT-Seg |      |       |          | A-150       |           | PC-459      |            |
|------|------------|-----|-----|---------|------|-------|----------|-------------|-----------|-------------|------------|
|      | HECG       | GFD | CER | Enc.    | Dec. | Feat. | Backbone | mIoU        | Time (ms) | mIoU        | Time (ms)  |
| (a)  | ✓          | ✓   | ✓   |         |      |       |          | 31.6        | <b>82</b> | <b>18.6</b> | <b>120</b> |
| (b)  | ✓          | ✓   |     |         |      |       |          | <b>31.8</b> | 178       | <b>18.6</b> | 468        |
| (c)  |            | ✓   |     | ✓       |      |       |          | 27.2        | 287       | 16.7        | 806        |
| (d)  |            |     |     | ✓       | ✓    |       |          | 25.9        | 323       | 16.0        | 916        |
| (e)  |            |     |     | ✓       | ✓    |       | ✓        | 27.2        | 362       | 16.6        | 1004       |

Table 1. Impact of transforming SED to CAT-Seg.

### 1. Impact of transforming SED to CAT-Seg

To better show the efficacy of our SED, we perform the experiment by transforming SED to CAT-Seg. On A-150, when replacing our HECG by CAT-Seg encoder (b→c), mIoU drops from 31.8 to 27.2, and inference time increases from 178ms to 287ms. When further replacing our GFD by CAT-Seg decoder (c→d), mIoU drops from 27.2 to 25.9, and inference time increases from 287ms to 323ms. The similar tendency is observed on PC-459. Moreover, our SED (a) *significantly* outperforms CAT-Seg (e) at faster speed.
